# Supplementary material
Source: publisher figshare collection journal article supplement (https://acs.figshare.com/ndownloader/files/18039347)
Supplement: Supplementary file 1 [file 18039347]

Supporting Information

for

## Phyllosilicates-derived CuNi/SiO<sub>2</sub> catalysts in the selective hydrogenation of adipic acid to 1,6-hexandiol

Cheng-Chieh Tu,<sup>1</sup> Ya-Ju Tsou,<sup>1</sup> Thien Dien To,<sup>1</sup> Chao-Huang Chen,<sup>2</sup> Jyh-Fu Lee,<sup>3</sup> George W. Huber,<sup>4</sup> and Yu-Chuan Lin<sup>1, \*</sup>

<sup>1</sup>Department of Chemical Engineering, National Cheng Kung University, 1 University Road, Tainan 70101, Taiwan

<sup>2</sup>Division of Chemical Engineering, Material and Chemical Research Laboratories, Industrial Technology Research Institute, 321, Section 2, Kuang Fu Road, Hsinchu 30011, Taiwan

<sup>3</sup> National Synchrotron Radiation Research Center, 101 Hsin-Ann Road, Hsinchu 30076, Taiwan

<sup>4</sup>Department of Chemical and Biological Engineering, University of Wisconsin–Madison, Madison, 1415 Engineering Drive, Wisconsin 53706, United States

\* Corresponding author's email: [yclin768@mail.ncku.edu.tw](mailto:yclin768@mail.ncku.edu.tw)

Numbers of pages: 15

Numbers of figures: 11

Numbers of tables: 2

### Activity Evaluation

The definition of conversion of reactant was defined as below:

$$\text{Conversion of reactant (\%)} = \frac{\text{Moles of reactant consumed}}{\text{Moles of reactant fed in}} \times 100\% \quad (\text{Eq. S1})$$

In this study, adipic acid (AA), succinic acid (SUC), glutaric acid (GLU), butyric acid (BTA), pentanoic acid (PTA) and hexanoic acid (HXA) were tested as the reactants.

The definitions of selectivity and yield are as below:

$$\text{Selectivity of product } i \text{ (\%)} = \frac{\text{Moles of product } i \text{ formed}}{\text{Sum of moles of all product formed}} \times 100\% \quad (\text{Eq. S2})$$

$$\text{Yield of product } i \text{ (\%)} = \frac{\text{Moles of product } i \text{ formed}}{\text{Moles of reactant fed in}} \times 100\% \quad (\text{Eq. S3})$$

To reveal the intrinsic activity of selective hydrogenation, the TOF was calculated as:

$$\text{TOF} = \frac{\text{Moles of reactant consumed}}{(\text{Time, h}) \times (\text{Moles of the sum of Cu}^0 \text{ and Cu}^+)} \quad (\text{Eq. S4})$$

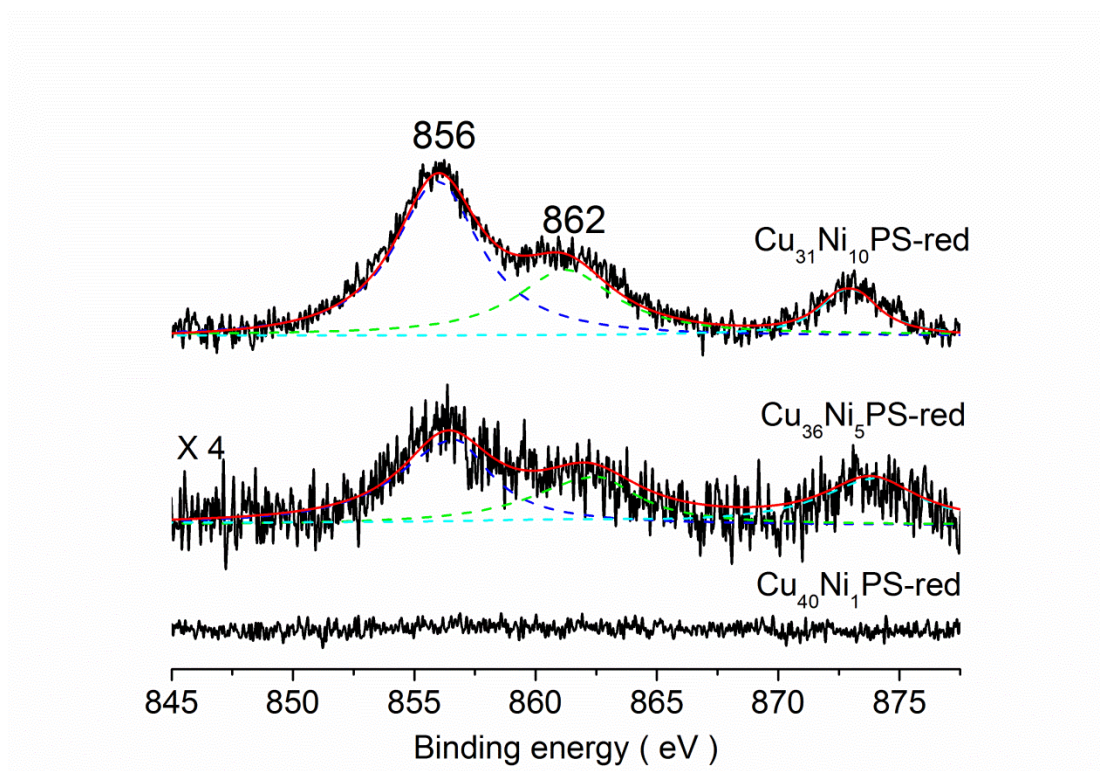

**Figure S1.** XPS spectra of Ni 2p core level of Cu<sub>x</sub>Ni<sub>41-x</sub>PS-red (x = 40, 36, and 31)

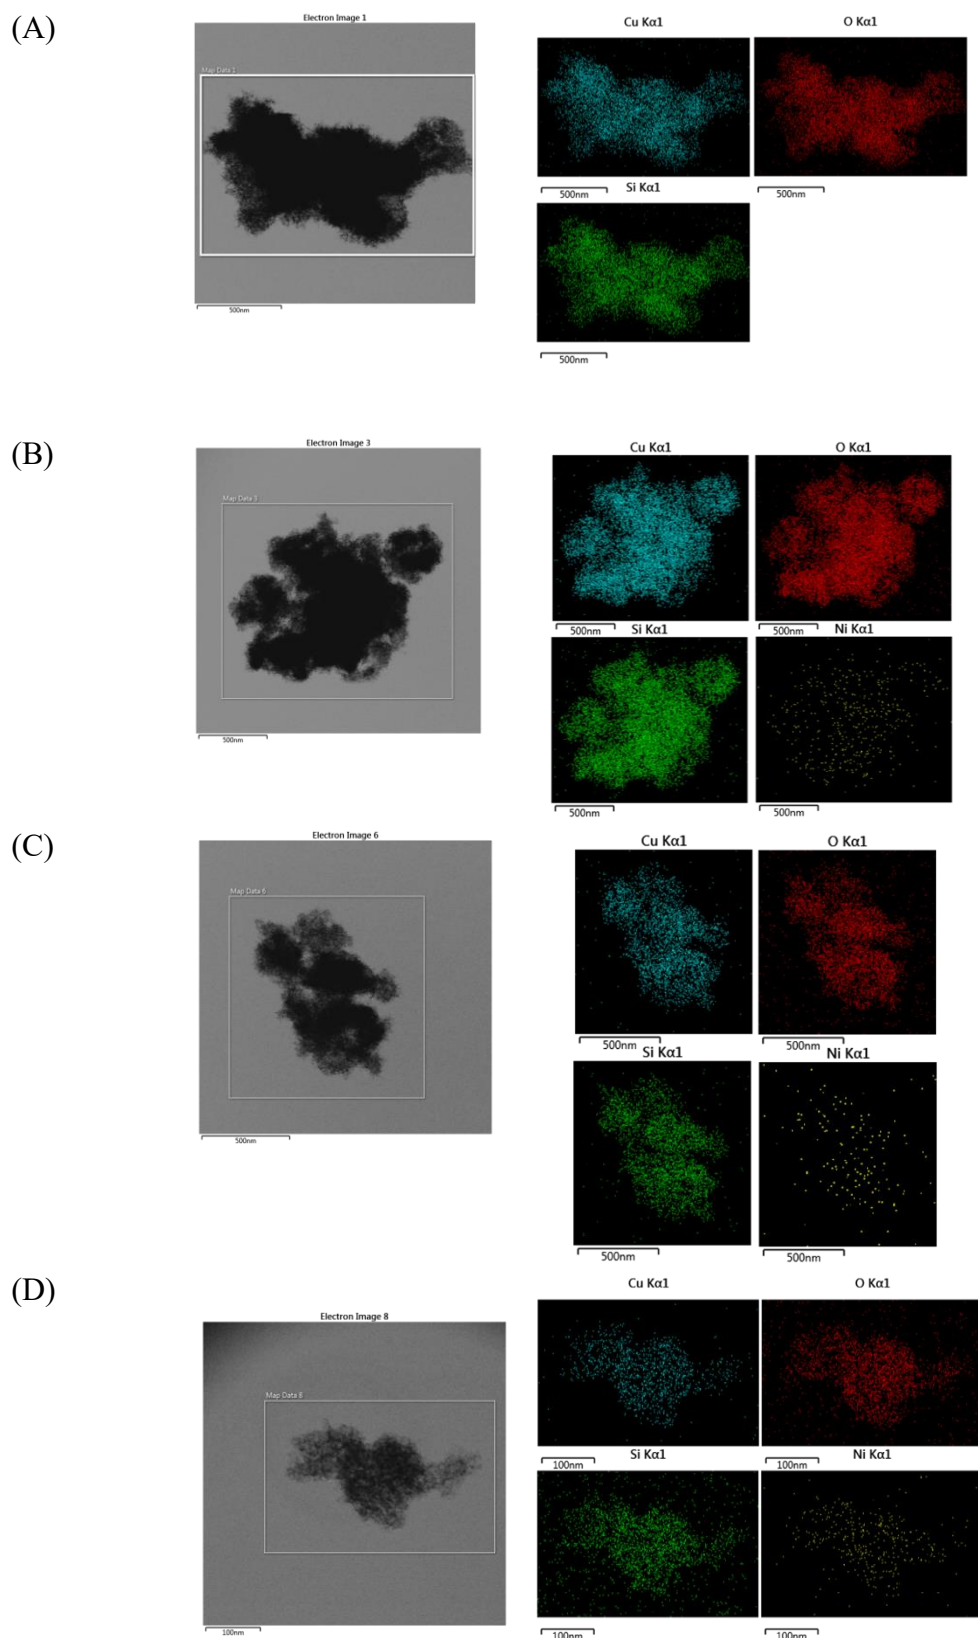

**Figure S2.** EDXS mapping images of Cu, O, Si, and Ni of (A)  $\text{Cu}_{41}\text{PS-red}$ , (B)  $\text{Cu}_{40}\text{Ni}_1\text{PS-red}$ , (C)  $\text{Cu}_{36}\text{Ni}_5\text{PS-red}$ , and (D)  $\text{Cu}_{31}\text{Ni}_{10}\text{PS-red}$

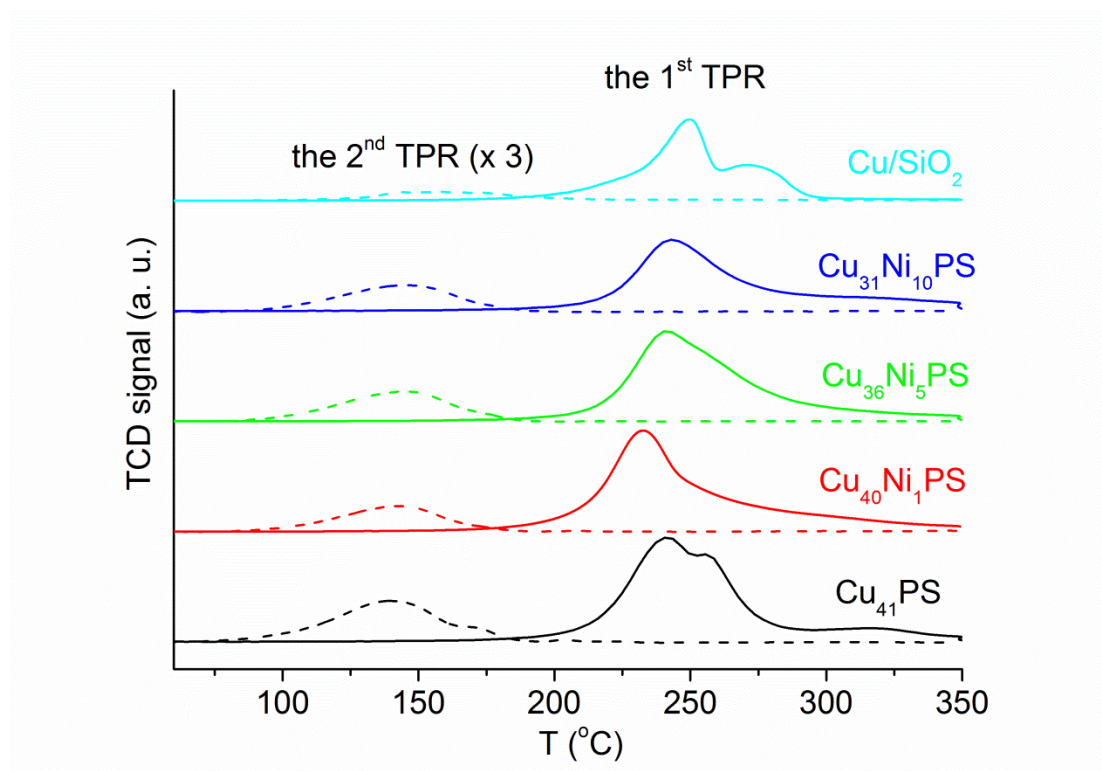

**Figure S3.** The first (solid line) and the second H<sub>2</sub>-TPR profiles (dash line) after dissociative N<sub>2</sub>O adsorption of as-prepared PS precursors and Cu/SiO<sub>2</sub>

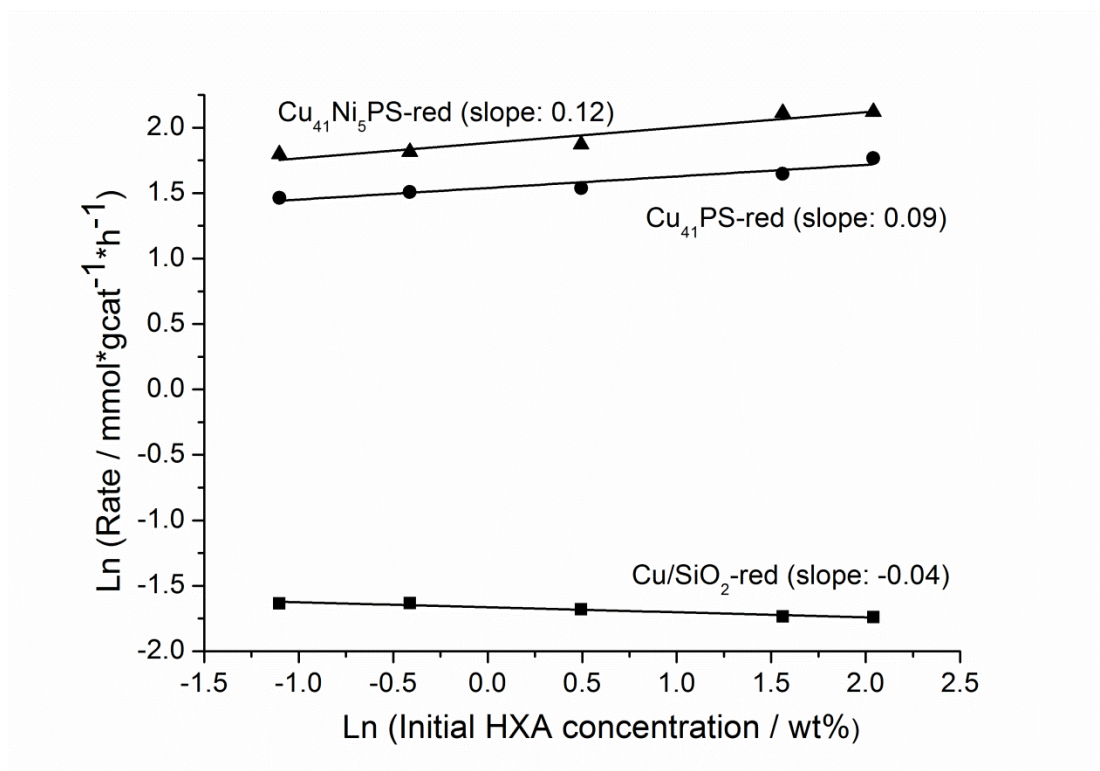

**Figure S4.** The log-log plot of kinetic data of hydrogenation rate with respect to initial concentration of hexanoic acid (HXA) by using Cu/SiO<sub>2</sub>-red, Cu<sub>41</sub>PS-red, and Cu<sub>36</sub>Ni<sub>5</sub>PS-red. Reaction conditions: HXA = 0.2, 0.4, 1.0, 2.8, or 4.6 g, 1,4-dioxane 60 mL, catalyst 0.1g, temperature 240 °C, H<sub>2</sub> pressure 6 MPa, and reaction time 1 h.

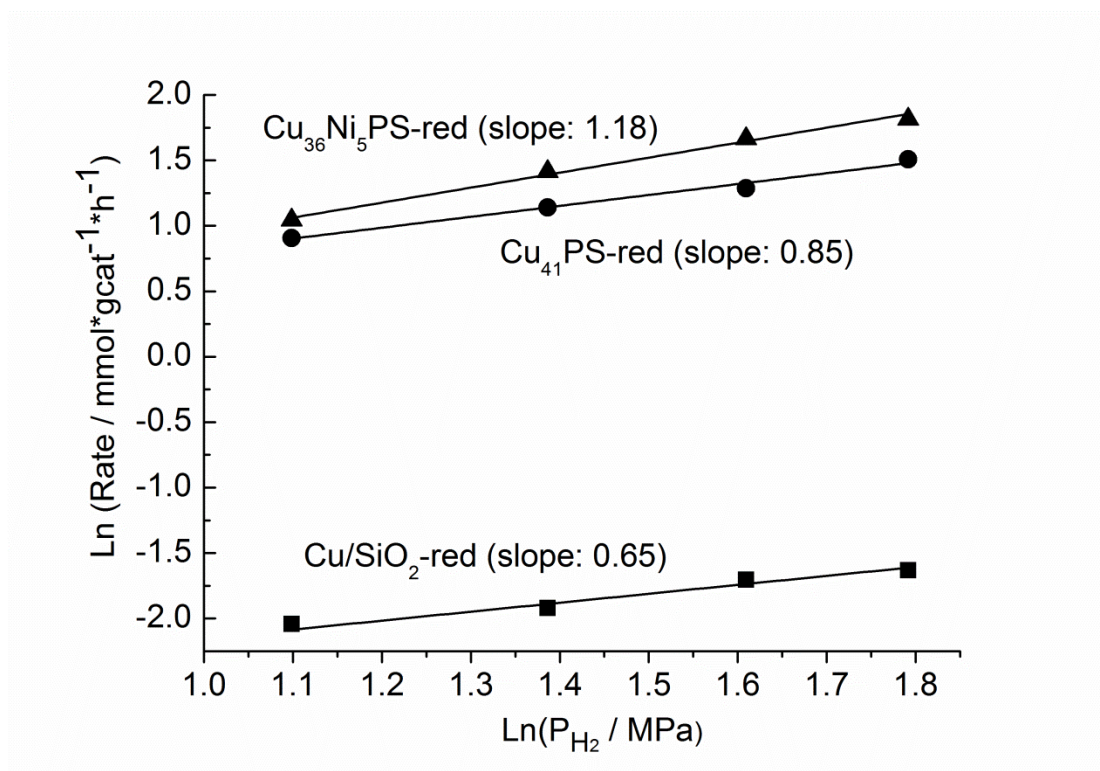

**Figure S5.** The log-log plot of kinetic data of hydrogenation rate of hexanoic acid (HXA) with respect to  $H_2$  pressure by using  $Cu/SiO_2$ -red,  $Cu_{41}PS$ -red, and  $Cu_{36}Ni_5PS$ -red. Reaction conditions: HXA 400 mg, 1,4-dioxane 60 mL, catalyst 0.1 g, temperature 240 °C,  $H_2$  pressure = 3, 4, 5, or 6 MPa, and reaction time 1 h.



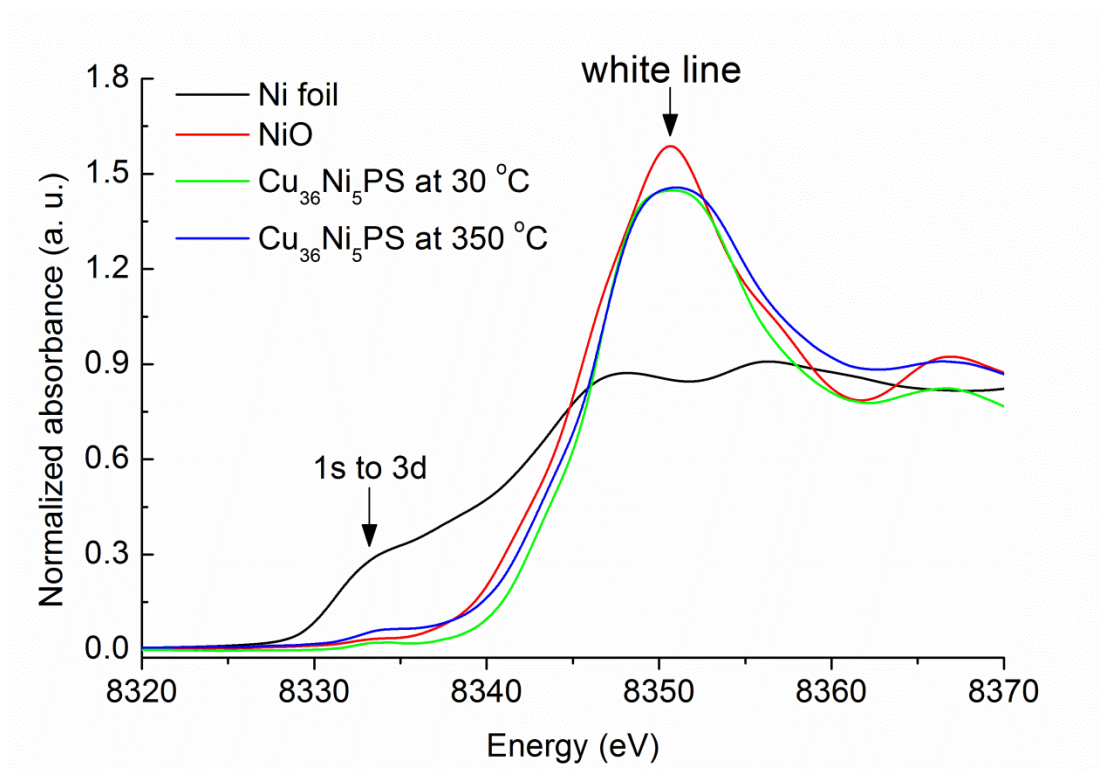

**Figure S6.** Ni *K*-edge XANES spectra of Ni foil, NiO, H<sub>2</sub>-reduced Cu<sub>36</sub>Ni<sub>5</sub>PS at 30 °C, and H<sub>2</sub>-reduced Cu<sub>36</sub>Ni<sub>5</sub>PS at 350 °C



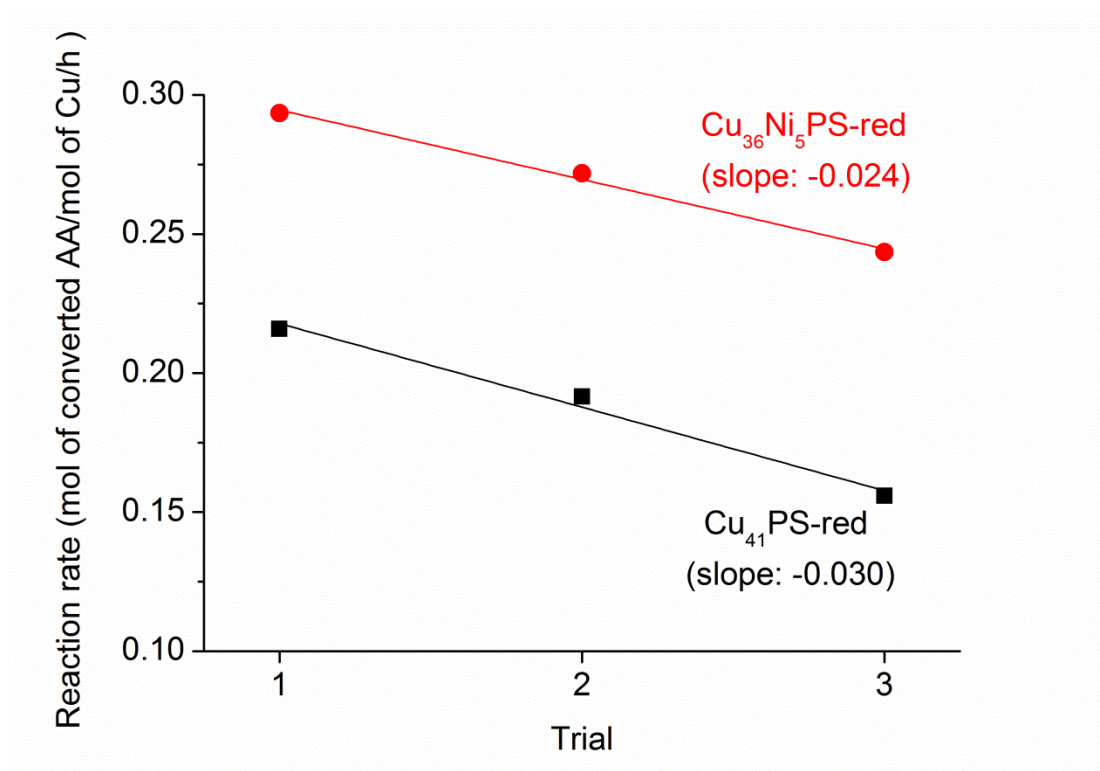

**Figure S7.** Deactivation rates of  $\text{Cu}_{41}\text{PS-red}$  and  $\text{Cu}_{36}\text{Ni}_5\text{PS-red}$  in the three consecutive trials of AA conversion

(A)

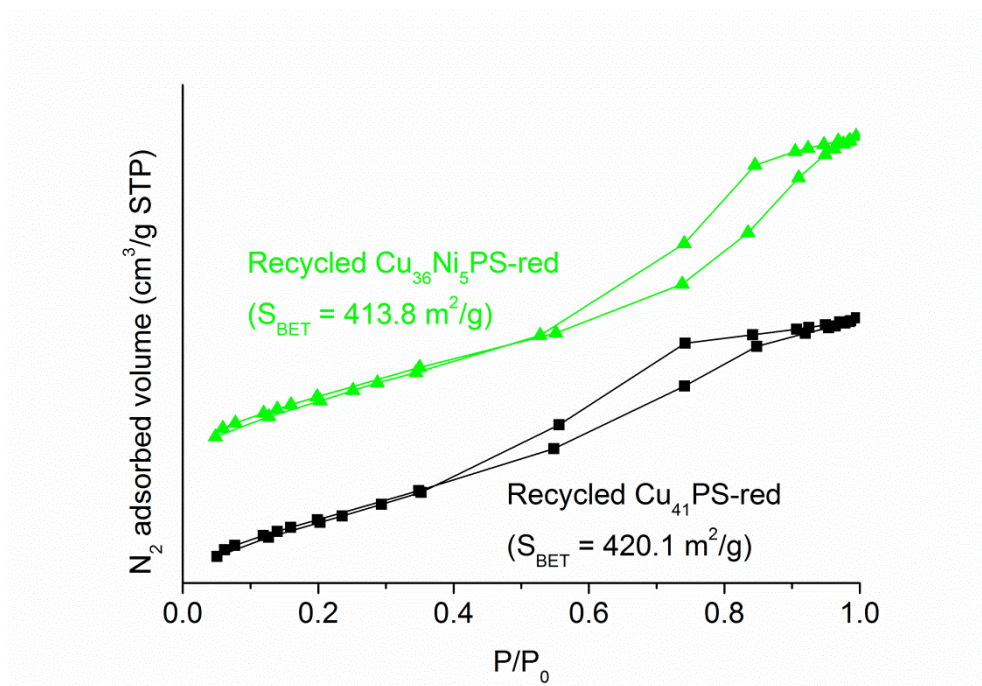

(B)

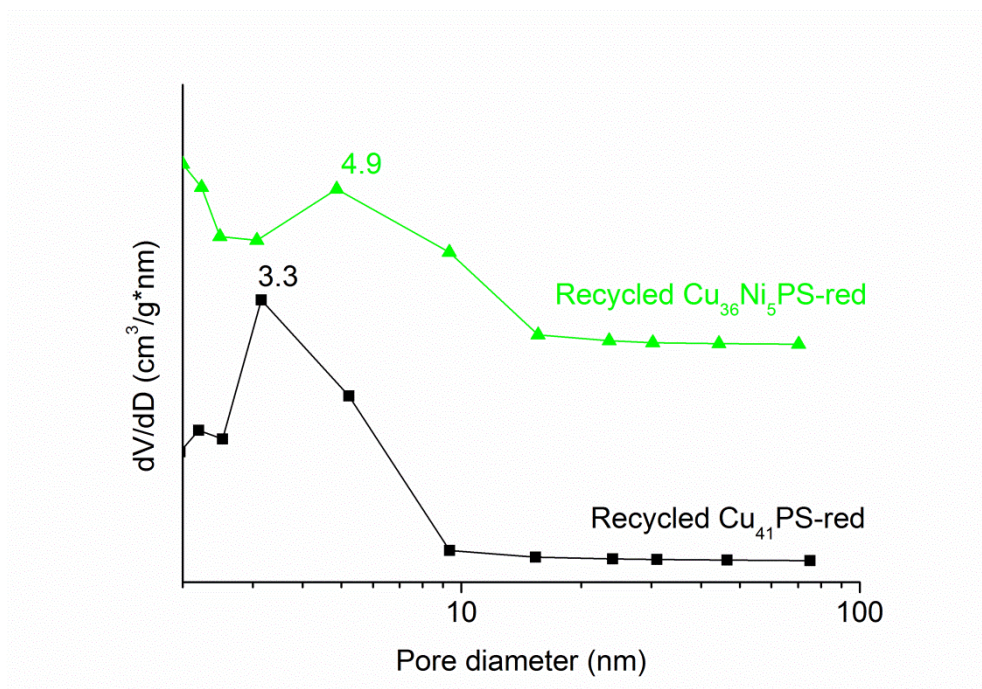

**Figure S8.** (A)  $N_2$  isotherms and (B) pore size distributions of recycled  $\text{Cu}_{41}\text{PS-red}$  and  $\text{Cu}_{36}\text{Ni}_5\text{PS-red}$ .

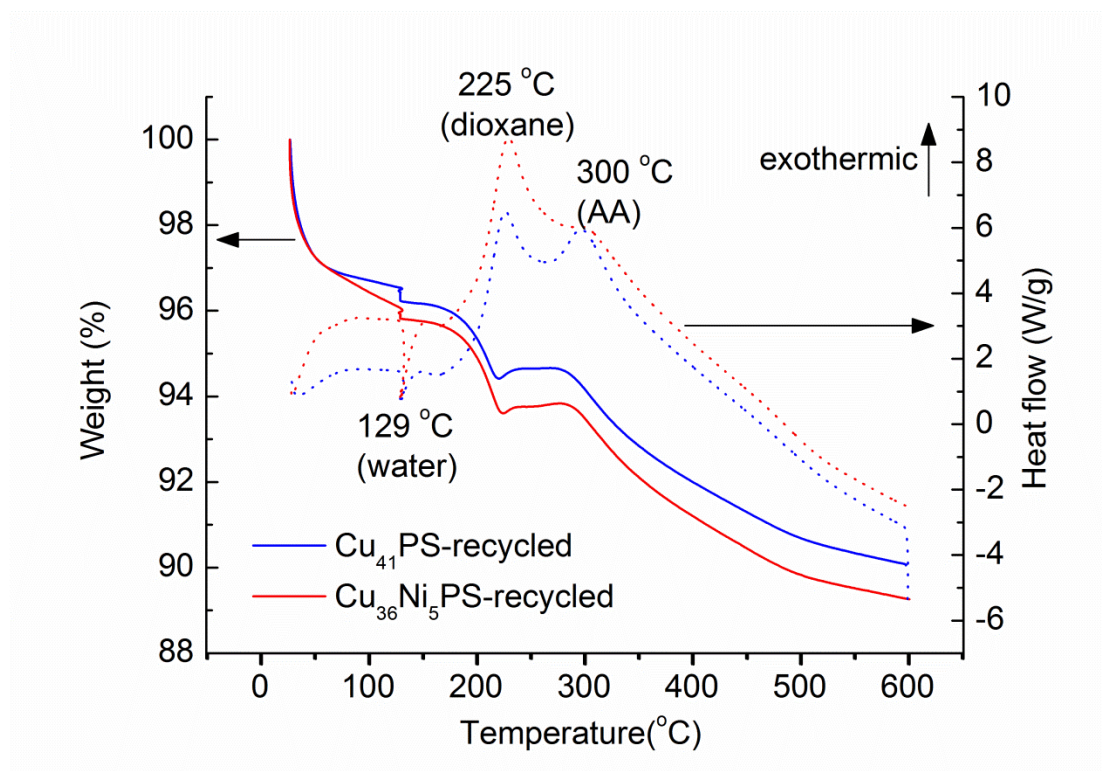

**Figure S9.** TGA (solid) and DTA (dash) profiles of  $\text{Cu}_{41}\text{PS}$ -red and  $\text{Cu}_{36}\text{Ni}_5\text{PS}$ -red after using in three successive tests in AA conversion



(A)

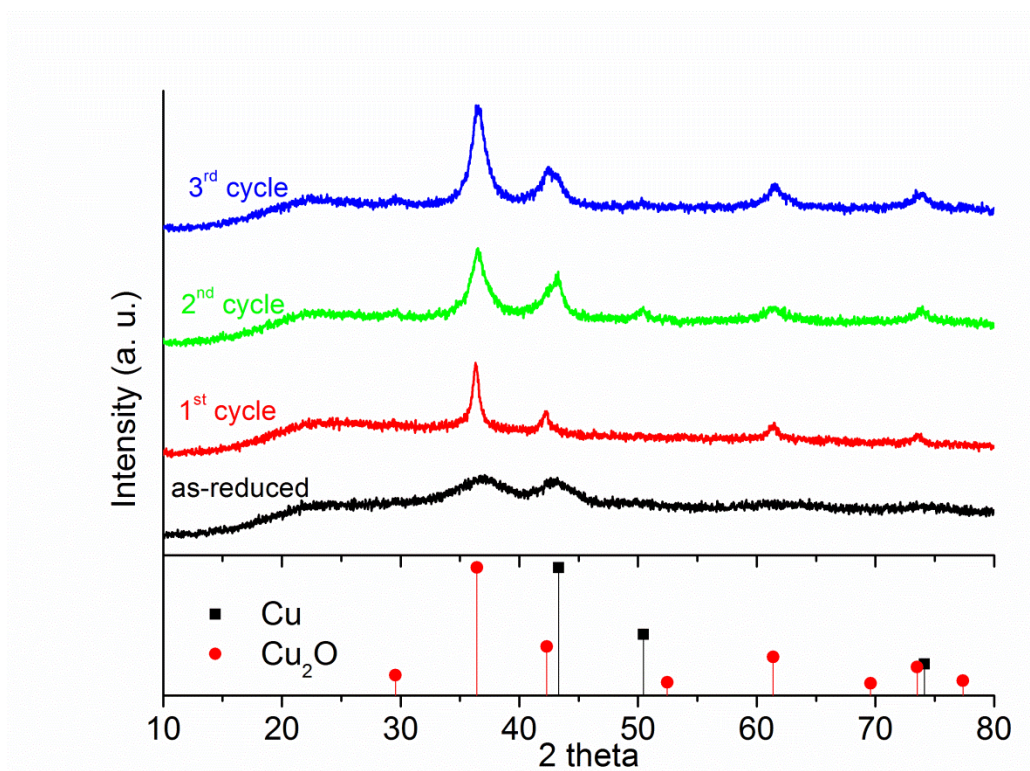

(B)

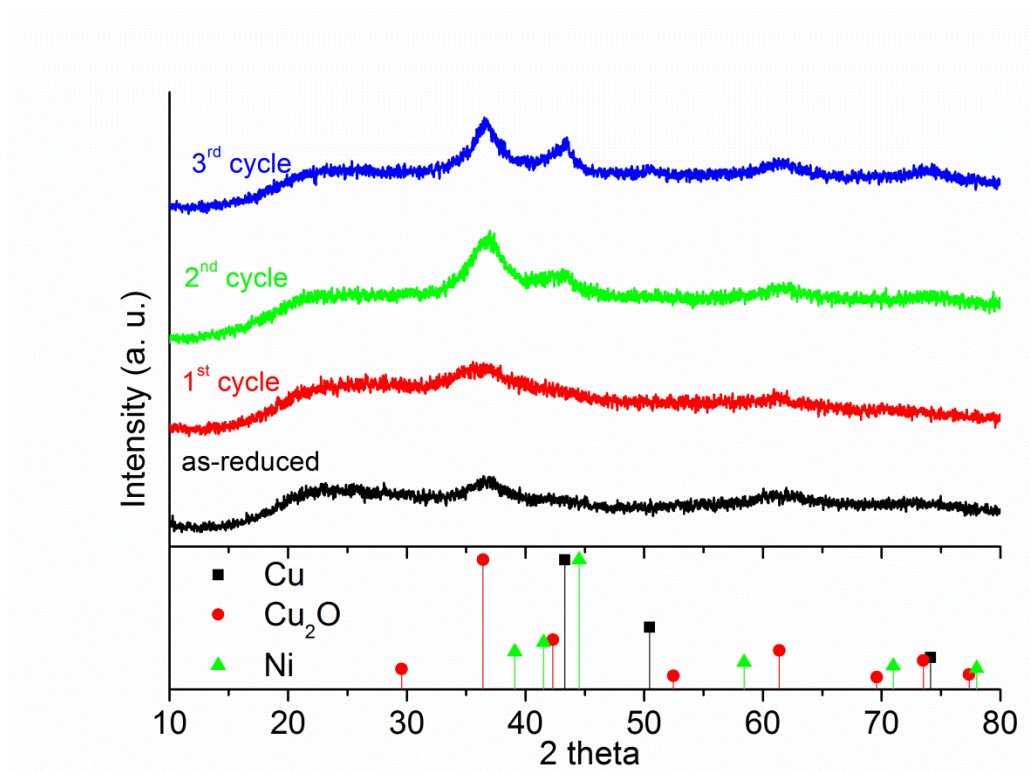

**Figure S10.** XRD patterns of recycled (A)  $\text{Cu}_{41}\text{PS-red}$  and (B)  $\text{Cu}_{36}\text{Ni}_5\text{PS-red}$  in AA hydrogenation

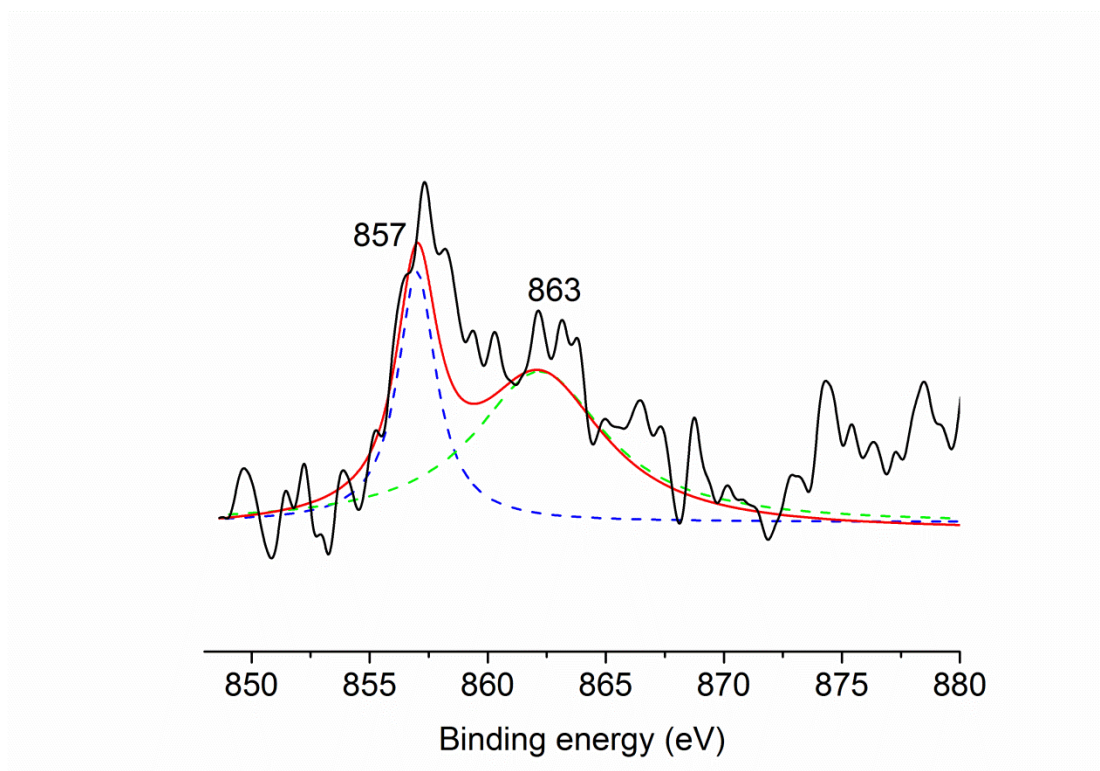

**Figure S11.** XPS spectrum of Ni 2p core level of recycled Cu<sub>36</sub>Ni<sub>5</sub>PS-red.

**Table S1.** Compositions and leached metals of recycled Cu<sub>41</sub>PS-red and Cu<sub>36</sub>Ni<sub>5</sub>PS-red determined by ICP-AES analyses

|                       | Cu <sub>41</sub> PS-red |                     | Cu <sub>36</sub> Ni <sub>5</sub> PS-red |                     |             |                     |
|-----------------------|-------------------------|---------------------|-----------------------------------------|---------------------|-------------|---------------------|
|                       | Cu<br>(wt%)             | Leached<br>Cu (ppm) | Cu<br>(wt%)                             | Leached<br>Cu (ppm) | Ni<br>(wt%) | Leached<br>Ni (ppm) |
| Fresh                 | 40.4                    | -                   | 35.6                                    |                     | 3.9         |                     |
| 1 <sup>st</sup> cycle | 37.2                    | 3.9                 | 33.1                                    | 3.1                 | 3.8         | ND                  |
| 2 <sup>nd</sup> cycle | 34.8                    | 3.5                 | 31.8                                    | 2.9                 | 3.9         | ND                  |
| 3 <sup>rd</sup> cycle | 32.9                    | 3.2                 | 31.1                                    | 2.9                 | 3.8         | ND                  |

ND = undetectable

**Table S2.** Initial activity of Cu<sub>41</sub>PS-red and Cu<sub>36</sub>Ni<sub>5</sub>PS-red in succinic acid (SUC), glutaric acid (GLU), butyric acid (BTA), pentanoic acid (PTA) and hexanoic acid (HXA) hydrogenation to  $\gamma$ -butyrolactone (GBL),  $\delta$ -valerolactone (DVL), n-butanol, n-pentanol and n-hexanol, respectively.<sup>a</sup>

| Substrate                                                                                  | Catalyst                                | X (%) | Time (h) | CB (%) | Selectivity (%) |      |              | TOF (h <sup>-1</sup> ) |
|--------------------------------------------------------------------------------------------|-----------------------------------------|-------|----------|--------|-----------------|------|--------------|------------------------|
|                                                                                            |                                         |       |          |        | Lactone         | Diol | Mono-alcohol |                        |
| SUC<br>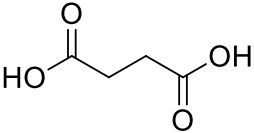   | Cu <sub>41</sub> PS-red                 | 20.8  | 0.17     | 97.8   | 79.2            | 20.8 | 0            | 14.7                   |
|                                                                                            | Cu <sub>36</sub> Ni <sub>5</sub> PS-red | 28.6  | 0.17     | 96.2   | 72.3            | 27.7 | 0            | 24.7                   |
|                                                                                            | Cu/SiO <sub>2</sub> -red                | 25.1  | 3.0      | 86.9   | 78.6            | 21.4 | 0            | 6.5                    |
| GLU<br>   | Cu <sub>41</sub> PS-red                 | 24.1  | 0.5      | 96.7   | 82.2            | 17.8 | 0            | 5.1                    |
|                                                                                            | Cu <sub>36</sub> Ni <sub>5</sub> PS-red | 34.1  | 0.5      | 95.4   | 74.4            | 25.6 | 0            | 9.0                    |
|                                                                                            | Cu/SiO <sub>2</sub> -red                | 11.0  | 3.0      | 88.5   | 96.1            | 3.9  | 0            | 2.5                    |
| BTA<br>   | Cu <sub>41</sub> PS-red                 | 12.5  | 1.0      | 99.8   | -               | -    | >99.9        | 2.0                    |
|                                                                                            | Cu <sub>36</sub> Ni <sub>5</sub> PS-red | 18.8  | 1.0      | 99.9   | -               | -    | >99.9        | 3.7                    |
|                                                                                            | Cu/SiO <sub>2</sub> -red                | 1.1   | 6.0      | 90.1   | -               | -    | >99.9        | 0.2                    |
| PTA<br>  | Cu <sub>41</sub> PS-red                 | 21.2  | 1.0      | 98.0   | -               | -    | >99.9        | 2.9                    |
|                                                                                            | Cu <sub>36</sub> Ni <sub>5</sub> PS-red | 28.7  | 1.0      | 97.5   | -               | -    | >99.9        | 4.8                    |
|                                                                                            | Cu/SiO <sub>2</sub> -red                | 4.3   | 6.0      | 87.0   | -               | -    | >99.8        | 0.6                    |
| HXA<br> | Cu <sub>41</sub> PS-red                 | 12.0  | 1.0      | 99.4   | -               | -    | >99.9        | 1.4                    |
|                                                                                            | Cu <sub>36</sub> Ni <sub>5</sub> PS-red | 16.3  | 1.0      | 99.8   | -               | -    | >99.9        | 2.4                    |
|                                                                                            | Cu/SiO <sub>2</sub> -red                | 3.1   | 6.0      | 86.3   | -               | -    | >99.9        | 0.4                    |

<sup>a</sup> Reaction condition: T = 240 °C, P = 6 MPa
